# Supplementary material
Source: PubMed Central journal article supplement (PMC3473098)
Supplement: NIHMS396691-supplement-01.pdf [file NIHMS396691-supplement-01.pdf]

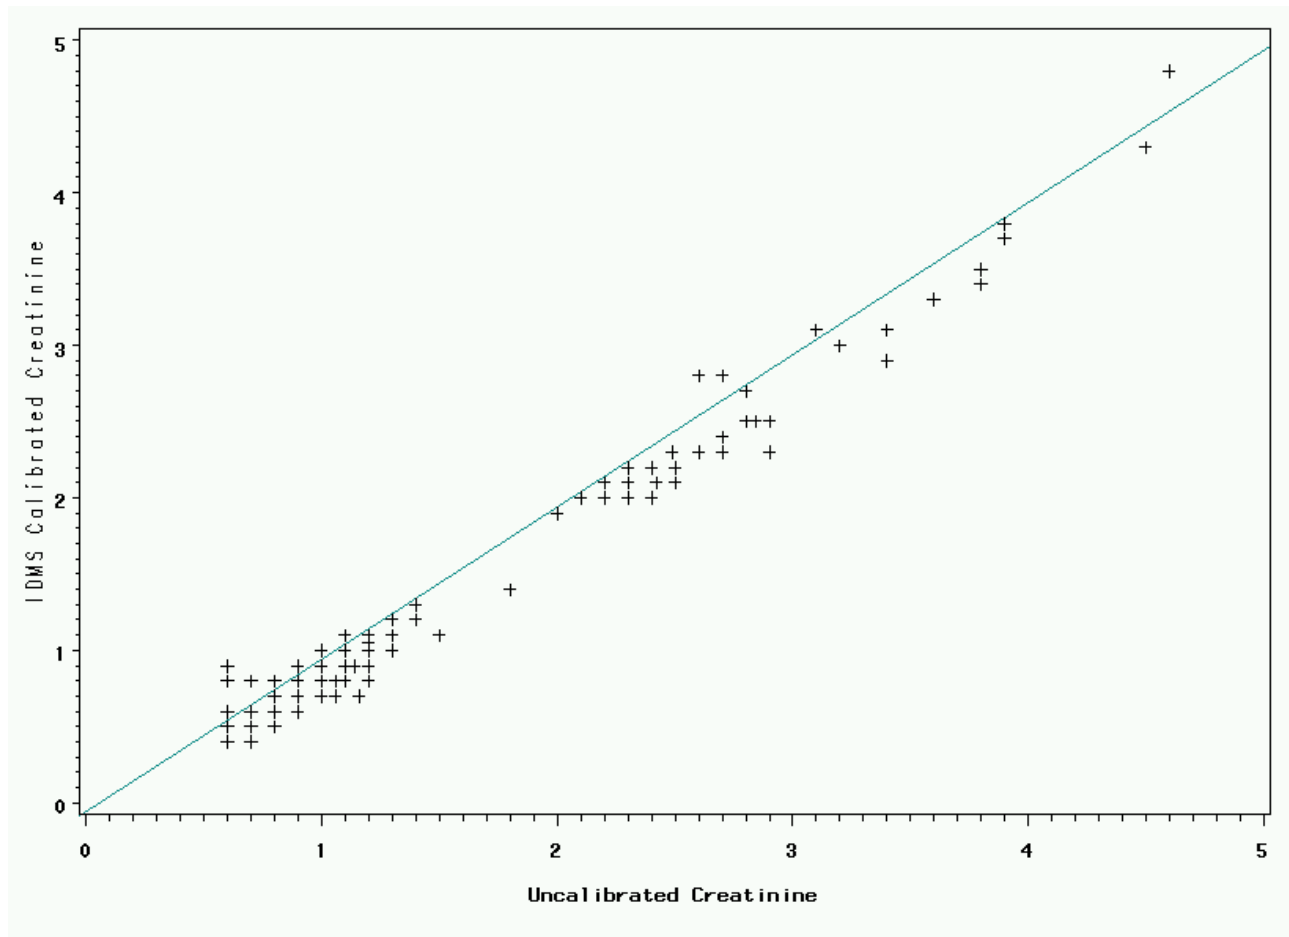

**Figure S1.** Scatterplot between uncalibrated creatinine and IDMS-calibrated creatinine. The solid line in the scatterplot is the 45° line.
