# Supplementary material
Source: PubMed Central journal article supplement (PMC3473098)
Supplement: NIHMS396691-supplement-02.pdf [file NIHMS396691-supplement-02.pdf]

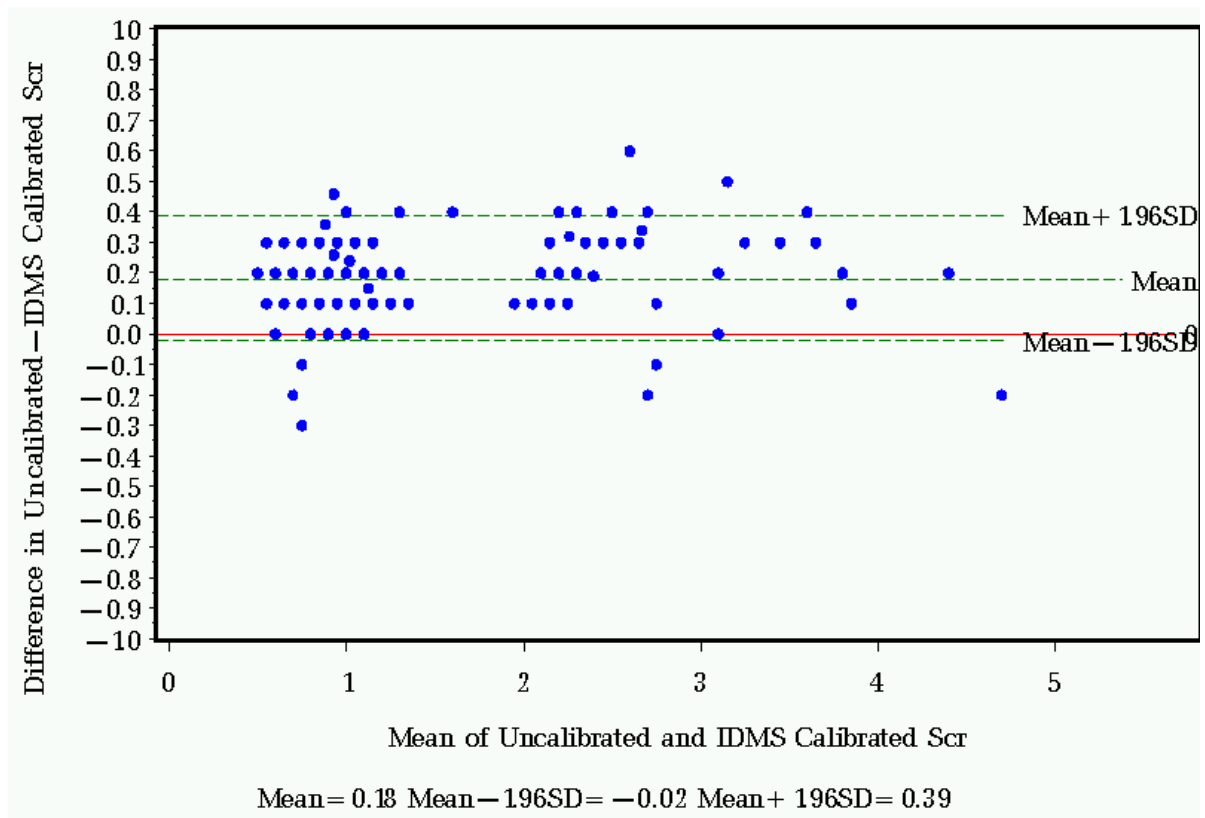

**Figure S2.** Bland-Altman plot of uncalibrated creatinine and IDMS-calibrated creatinine. Abbreviations: SD = Standard deviation.
