# Supplementary material
Source: PubMed Central journal article supplement (PMC3473098)
Supplement: NIHMS396691-supplement-03.pdf [file NIHMS396691-supplement-03.pdf]

Supplementary Table S1; Shara et al, AJKD, "Estimated GFR and Incident Cardiovascular Disease Events in American Indians: The Strong Heart Study"

| Model                                                     | eGFR MDRD original |              |                 |                 |                 | C statistic |
|-----------------------------------------------------------|--------------------|--------------|-----------------|-----------------|-----------------|-------------|
|                                                           | ≥120               | 90 - <120    | 60 - < 90       | 30 - < 60       | <30             |             |
| <b>No. of participants</b>                                | 125                | 1265         | 2293            | 350             | 48              | --          |
| <b>Mean±SD of eGFR by eGFR MDRD (original) categories</b> |                    |              |                 |                 |                 |             |
| eGFR MDRD original                                        | 134.2±17.6         | 99.2±7.8     | 76.1±7.4        | 51.5±7.3        | 17.9±7.6        | ---         |
| eGFR CKD-EPI                                              | 124.5±8.1          | 109.9±5.4    | 95.8±8.1        | 63.2±10.7       | 19.0±8.7        | ---         |
| eGFR MDRD IDMS                                            | 187.2±49.5         | 127.4±14.0   | 92.4±10.8       | 59.1±9.6        | 18.5±8.2        | ---         |
| <b>CVD</b>                                                |                    |              |                 |                 |                 |             |
| Model 1                                                   | 1.34(0.96-1.87)    | 1(reference) | 1.00(0.87-1.15) | 1.34(1.08-1.66) | 2.80(1.85-4.24) | 0.700       |
| Model 2                                                   | 1.20(0.85-1.68)    | 1(reference) | 1.01(0.88-1.16) | 1.16(0.93-1.45) | 1.84(1.18-2.85) | 0.710       |
| <b>CHD</b>                                                |                    |              |                 |                 |                 |             |
| Model 1                                                   | 1.25(0.85-1.84)    | 1(reference) | 1.04(0.89-1.22) | 1.43(1.10-1.85) | 3.22(2.02-5.13) | 0.711       |
| Model 2                                                   | 1.13(0.76-1.68)    | 1(reference) | 1.06(0.90-1.24) | 1.25(0.96-1.63) | 2.16(1.31-3.56) | 0.720       |
| <b>Stroke</b>                                             |                    |              |                 |                 |                 |             |
| Model 1                                                   | 1.72(0.93-3.17)    | 1(reference) | 0.99(0.75-1.32) | 1.43(0.94-2.18) | 1.66(0.60-4.61) | 0.715       |
| Model 2                                                   | 1.50(0.81-2.78)    | 1(reference) | 0.99(0.74-1.31) | 1.24(0.81-1.90) | 1.07(0.38-3.03) | 0.733       |
| <b>HF</b>                                                 |                    |              |                 |                 |                 |             |
| Model 1                                                   | 1.40(0.74-2.62)    | 1(reference) | 1.02(0.79-1.32) | 1.37(0.94-2.00) | 3.50(1.79-6.84) | 0.737       |
| Model 2                                                   | 1.23(0.65-2.31)    | 1(reference) | 1.01(0.78-1.31) | 1.10(0.74-1.62) | 1.98(0.99-3.96) | 0.756       |

**Table S1.** Hazard Ratios for Incident CVD, CHD, Stroke, and Heart Failure According to eGFR (by original MDRD Study equation) Category.

Abbreviations: CHD = coronary heart disease; CKD-EPI = Chronic Kidney Disease Epidemiology Collaboration equation; CVD = cardiovascular disease; eGFR = estimated glomerular filtration rate; MDRD = Modification of Diet in Renal Disease equation.

Data are hazard ratios (95% confidence interval) for CVD, CHD, and stroke.

Model 1: Adjusted for age, sex, low-density lipoprotein cholesterol, high-density lipoprotein cholesterol, hypertension (yes vs. no), diabetes (yes vs. no), and smoking (never, past, or current).

Model 2: Adjusted for all variables in Model 1, plus albuminuria (normal, microalbuminuria, or macroalbuminuria).
