# Supplementary material
Source: PubMed Central journal article supplement (PMC3473098)
Supplement: NIHMS396691-supplement-04.pdf [file NIHMS396691-supplement-04.pdf]

| Model         | AIC     | C statistics (95% CI) | Hosmer-Lemeshow |
|---------------|---------|-----------------------|-----------------|
| <b>CVD</b>    |         |                       |                 |
| CKD-EPI       |         |                       |                 |
| Model 1       | 18761.8 | 0.701(0.638,0.760)    | 43.2852         |
| Model 2       | 18477.1 | 0.711(0.648,0.770)    | 70.4724         |
| MDRD          |         |                       |                 |
| Model 1       | 18756.9 | 0.702(0.639,0.761)    | 44.7680         |
| Model 2       | 18473.6 | 0.711(0.649,0.771)    | 74.4724         |
| <b>CHD</b>    |         |                       |                 |
| CKD-EPI       |         |                       |                 |
| Model 1       | 13470.6 | 0.713(0.640,0.781)    | 40.2734         |
| Model 2       | 13221.6 | 0.721(0.647,0.788)    | 53.1043         |
| MDRD          |         |                       |                 |
| Model 1       | 13464.7 | 0.714(0.642,0.782)    | 37.5166         |
| Model 2       | 13217.1 | 0.722(0.649,0.789)    | 51.5488         |
| <b>Stroke</b> |         |                       |                 |
| CKD-EPI       |         |                       |                 |
| Model 1       | 4600.8  | 0.717(0.591,0.828)    | 40.3750         |
| Model 2       | 4577.8  | 0.733(0.609,0.842)    | 53.2918         |
| MDRD          |         |                       |                 |
| Model 1       | 4606.2  | 0.715(0.589,0.826)    | 42.6643         |
| Model 2       | 4581.0  | 0.733(0.608,0.842)    | 54.2090         |
| <b>HF</b>     |         |                       |                 |
| CKD-EPI       |         |                       |                 |
| Model 1       | 5585.8  | 0.741(0.631,0.838)    | 42.4216         |
| Model 2       | 5463.9  | 0.758(0.648,0.853)    | 57.5229         |
| MDRD          |         |                       |                 |
| Model 1       | 5581.7  | 0.740(0.630,0.837)    | 46.8696         |
| Model 2       | 5460.3  | 0.757(0.647,0.852)    | 50.1834         |

**Table S2.** Comparison of Models in Table 2 Using AIC, Discrimination Using C-Statistics, and Calibration Using Hosmer-Lemeshow Statistics.

Abbreviations: AIC = Akaike information criterion; CHD = coronary heart disease; CKD-EPI = Chronic Kidney Disease Epidemiology Collaboration equation; CVD = cardiovascular disease; eGFR = estimated glomerular filtration rate; MDRD = Modification of Diet in Renal Disease equation.
