# Supplementary material
Source: PubMed Central journal article supplement (PMC3473098)
Supplement: NIHMS396691-supplement-05.pdf [file NIHMS396691-supplement-05.pdf]

|                                                                             | CVD     |         | CHD     |        | Stroke |         | HF      |       |
|-----------------------------------------------------------------------------|---------|---------|---------|--------|--------|---------|---------|-------|
|                                                                             | NRI     | P       | NRI     | P      | NRI    | P       | NRI     | P     |
| eGFR as categorical variable (crude)                                        | NA      |         | NA      |        | 0.1289 | 0.0003  | 0.0293  | 0.094 |
| eGFR as categorical variable adjusted for variables in model 1 <sup>†</sup> | -0.001  | 0.8682  | -0.007  | 0.3740 | 0.019  | 0.3918  | -0.005  | 0.76  |
| eGFR as categorical variable adjusted for variable in model 2 <sup>‡</sup>  | -0.007  | 0.3017  | -0.0058 | 0.4376 | -0.002 | 0.9170  | -0.007  | 0.71  |
|                                                                             | IDI     | P       | IDI     | P      | IDI    | P       | IDI     | P     |
| eGFR as categorical variable (crude)                                        | 0.006   | <0.0001 | 0.003   | 0.0299 | 0.007  | <0.0001 | 0.005   | 0.001 |
| eGFR as categorical variable adjusted for variables in model 1 <sup>†</sup> | -0.0011 | 0.2056  | -0.0012 | 0.2031 | 0.0024 | 0.1418  | -0.0025 | 0.065 |
| eGFR as categorical variable adjusted for variable in model 2 <sup>‡</sup>  | -0.0006 | 0.3281  | -0.0009 | 0.1905 | 0.0014 | 0.3622  | -0.0021 | 0.08  |

**Table S3.** Net Reclassification Index by CKD-EPI Risk Categories (<10%, 10-<20%, and ≥20%) and Integrated Discrimination Improvement. Abbreviations: CVD, cardiovascular disease; CHD, coronary heart disease; HF = heart failure, NRI = net reclassification index; IDI = Integrated Discrimination Improvement.

\* All participants were categorized into the highest group (>20%) by both equation, so that there was no reclassification.

<sup>†</sup>Model 1: Adjusted for age, sex, low-density lipoprotein cholesterol, high-density lipoprotein cholesterol, hypertension (yes vs. no), diabetes (yes vs. no), and smoking (never, past, or current).

<sup>‡</sup>Model 2: Adjusted for all variables in Model 1, plus albuminuria (normal, microalbuminuria, or macroalbuminuria).
